# Supplementary material
Source: PubMed Central journal article supplement (PMC3380634)

**Atg**actaacgaaaccattaaccaacaaccacaaactgaagcggccttttaacccgcagcaa  
M T N E T I N Q Q P Q T E A A F N P Q Q 20  
tttatcaataatcttcaagtggccttttcttaaagttgataacgctgtcgcttcatacgat  
F I N N L Q V A F L K V D N A V A S Y D 40  
cctgatcaaaaaccaatcattgataagaacgatagggataacaggcaagccttttgagggg  
P D Q K P I I D K N D R D N R Q A F E G 60  
atctcgcaattaaggggaagaataactccaataaagcgatcaaaaatcctacaaaaagaat  
I S Q L R E E Y S N K A I K N P T K K N 80  
cagtatctttcagacttttatcaataagagcaatgatttaatacaaaaagacgatctcatt  
Q Y F S D F I N K S N D L I N K D D L I 100  
gatgtagaatcttccacaaagagcctttcagaaatttgggggatcagcgttaccgaattttc  
D V E S S T K S F Q K F G D Q R Y R I F 120  
acaagtgggtgtcccatcaaaacgatccgctctaaaatcaacacccgatcgatccgaaat  
T S W V S H Q N D P S K I N T R S I R N 140  
tttatggaaaatatcatacaacccccctatccctgatgacaaaagaaaaagcagagcttttg  
F M E N I I Q P P I P D D K E K A E F L 160  
aaatctgccaaacaatcttttgcaggaatcattatagggaatcaaatccgaacggatcaa  
K S A K Q S F A G I I I G N Q I R T D Q 180  
aagttcatgggctgtttgatgaatccttgaaagaaaggcaagaagcagaaaaaaatgga  
K F M G V F D E S L K E R Q E A E K N G 200  
gggcctactgggtggggattgggttgatatttttctctcatttatatttgacaaaaaacia  
G P T G G D W L D I F L S F I F D K K Q 220  
tcttctgatgtcaaagaagcaatcaatcaagaaccagttccccatgtccaaccagatata  
S S D V K E A I N Q E P V P H V Q P D I 240  
gccactaccaccaccacatacaaggcttaccgcctgaatctagggatttgcttgatgaa  
A T T T T H I Q G L P P E S R D L L D E 260  
aggggtaatttttctaaattcactcttggcgatagggaaatgtagatggtgagggagtc  
R G N F S K F T L G D M E M L D V E G V 280  
gctgacattgatcccaattacaagttcaatcaattattgattcacaataacgctctgtct  
A D I D P N Y K F N Q L L I H N N A L S 300  
tctgtgtaaatggggagtcataatggcatagaacctgaaaaagtttcattattgtatgcy  
S V L M G S H N G I E P E K V S L L Y A 320  
ggcaatgggtgggttttggagccaagcacgattggaacgccaccggttggttataaagaccaa  
G N G G F G A K H D W N A T V G Y K D Q 340  
caaggtaacaatgtggctacaataattaatgtgcatatgaaaaacggcagtggttggtc  
Q G N N V A T I I N V H M K N G S G L V 360  
atagcaggtgggtgagaaagggattaataaccctagtttttatctctacaaagaagaccaa  
I A G G E K G I N N P S F Y L Y K E D Q 380  
ctcacaggctcacaacgagcattgagtcagaagagatccgaaacaaaatagatttcatg  
L T G S Q R A L S Q E E I R N K I D F M 400  
gaatttcttgcacaaaataatgctaaattagacaacttgagcgagaaagagaaagaaaa  
E F L A Q N N A K L D N L S E K E K E K 420  
ttccgaactgagattaaggatttccaaaaagactctaaggcttatttagacgccttaggg  
F R T E I K D F Q K D S K A Y L D A L G 440  
aatgatcgtattgcttttgtttctaaaaaagacccaaaacattcagctttaattactgag  
N D R I A F V S K K D P K H S A L I T E 460  
tttggttaaggggatttgagctacactctcaaagattatgggaaaaaagcagataaagct  
F G K G D L S Y T L K D Y G K K A D K A 480  
Ttagatagggagaaaaatgttactcttcaaggtagcctaaaacatgatggcgtgatgttt  
L D R E K N V T L Q G S L K H D G V M F 500  
Gttgattatttcaatttcaatacaccaacgcctccaagaatcccaataaggggtgtaggc  
V D Y S N F K Y T N A S K N P N K G V G 520  
gttacaaatggcgtttccatttagaagcaggcttttagcaaggtagctgtctttaatttg  
V T N G V S H L E A G F S K V A V F N L 540  
cctgattttaaataatctcgctatcactagtttcgtaaggcgggaatttagaggataaacta  
P D L N N L A I T S F V R R N L E D K L 560  
gccactaaaggattgtccctacaagaagctaataagcttatcaagattttttgagcagc

A T K G L S L Q E A N K L I K D F L S S 580  
aacaaagaattgggttgaaaagctttaacttcaataaagctgtagctgaagctaaaaac  
N K E L V G K A L N F N K A V A E A K N 600  
acaggcaattatgatgaagtgaaaaagctcagaaagatcttgaaaaatctctaaggaaa  
T G N Y D E V K K A Q K D L E K S L R K 620  
cgagagcatttagagaaaagaagtagagaaaaaattggagagcaaaagcggcaacaaaaac  
R E H L E K E V E K K L E S K S G N K N 640  
aaaatggaagcgaaatctcaagctaacagccaaaaagatgagatTTTTgcgTTgattaat  
K M E A K S Q A N S Q K D E I F A L I N 660  
aaagaggctaatagggacgcaagagcaatcgcttacgctacgaatcttaaaggcgtcaaa  
K E A N R D A R A I A Y A T N L K G V K 680  
agggaaattgtctgataaaacttgaaaatgtcaacaagaatttgaaagactttagtaaatct  
R E L S D K L E N V N K N L K D F S K S 700  
tttgatgaattcaaaaatggcaaaaataaggatttcagcaaggcagaagaacgctaaaa  
F D E F K N G K N K D F S K A E E T L K 720  
acccttaaaggctcggTgaaagatttaggtatcaatccagaatggatttcaaaagttgaa  
T L K G S V K D L G I N P E W I S K V E 740  
aaccttaatgcagctttgaaTgaaTtcaaaaatggcaaaaataaggatttcagcaaggta  
N L N A A L N E F K N G K N K D F S K V 760  
acgcaagcaaaaagcgcacttgaaaattccgTtaaagatgtgatcatcaatcaaaagata  
T Q A K S D L E N S V K D V I I N Q K I 780  
acggataaagttgacaatctcaatcaagcggTatcagTggctaaagcaacgggtgatttc  
T D K V D N L N Q A V S V A K A T G D F 800  
agtagggtagagcaagcgttagccgatctcaaaaacttctcaaaggagcaattggcccaa  
S R V E Q A L A D L K N F S K E Q L A Q 820  
caagctcaaaaaaatgaagatttcaatactggaaaaaattctgcactataccaatccgTt  
Q A Q K N E D F N T G K N S A L Y Q S V 840  
aagaatggTgtgaaTggaaccctagTcggTaatgggttatctaaagcagaagccacaact  
K N G V N G T L V G N G L S K A E A T T 860  
ctttctaaaaaacttttcggacatcaagaagagTgaaTgcaaaaattggggaatttcaat  
L S K N F S D I K K E L N A K L G N F N 880  
aacaataacaataatggactcaaaaacgaaccatttacgctcaagTtaataaaaaagaaa  
N N N N N G L K N E P I Y A Q V N K K K 900  
gcaggacaagtagttagccctgaagagccatttacgctcaagTtgctaaaaagTtaaat  
A G Q V V S P E E P I Y A Q V A K K V N 920  
gcaaaaattgaccaactcaatcaagcagcaagTggTttggTggTgtagggcaagcgggc  
A K I D Q L N Q A A S G L G G V G Q A G 940  
ttccctttgaaaaggcatgataaagTtgatgatctcagTaaagTtagggcgatcggTtagc  
F P L K R H D K V D D L S K V G R S V S 960  
cctgaaccatttatgctacgattgatgatctcggcggacctttccctttgaaaagcat  
P E P I Y A T I D D L G G P F P L K K H 980  
gctaaagTtgaagatctcagTaaagTtagggctttcaagggagcaagaattgactcagaaa  
A K V E D L S K V G L S R E Q E L T Q K 1000  
attgacaatctcaatcaagcggTatcagaagctaaagcaggtttttttggcaatctagaa  
I D N L N Q A V S E A K A G F F G N L E 1020  
caaacgatagacaatctcaaagattctacaaaacacaatcccatgaatctatgggctgaa  
Q T I D N L K D S T K H N P M N L W A E 1040  
AgtgcaaaaaaagTgcctgctagTttgtcagcgaactagacaattacgctactaacagc  
S A K K V P A S L S A K L D N Y A T N S 1060  
cacacagcattaatagcaatatccaaaatggagcaatcaatgaaaaagcagcggTatg  
H T R I N S N I Q N G A I N E K A T G M 1080  
ctaacgcaaaaaaacctgagTggctcaagctcgtgaaTgataagatcgtTgcgcataat  
L T Q K N P E W L K L V N D K I V A H N 1100  
gtaggaagcgttccctttgtcagagTatgataaaaattggcttcaaccagaagaatagTaa  
V G S V P L S E Y D K I G F N Q K N M K 1120  
gattattctgattcgttcaagTtttccaccaagTtgaacaatgctgTaaaagatgTtagg  
D Y S D S F K F S T K L N N A V K D V R 1140

tctggctttacgcaatTTTTAGCCAATGCATTTTCTACAGGATATTACTGCTTGGCGGAA  
 S G F T Q F L A N A F S T G Y Y C L A E 1160  
 gaaaatgcagagcatggaatcaaaaatgTTAATACAAAAGGTGGTTTCAAAAATCTTA  
 E N A E H G I K N V N T K G G F Q K S 1179  
 aggattaaggaatacAAAAACGAAAAACCacccttgctaaaagcaaggggtTTTTTA  
 atactccttagcagaaatcccaatcgtctttagcggttgggatgaatgctaccaattcat  
 ggtatcatatccccatacattcgtatctagcgcaggaagtgtgcaaagttacgcctttgg  
 agatatgatgtgtgagacctgtagggaaatgcgttggagctcaaactctgtaaaatcccta  
 ctatagggacacagagtgagaaccaaactttcccccaacatcagcctaggaaaccaatc  
 gtcttttagcggttgggcacttcaccttaaaatatcccgacagacactaacgaaaggcttt  
 gctctttaaagtctgcatggatatttctacccccaaaaagacttaaccctttgcttaaaa  
 ttaaatttgattgtgctagtgggttcgtgctatagtgcgaaaattaattaagggttataa  
 agagagcatgaactagaaaaaacaagtagctataacaaaagatcaagttcaaaaaatcata  
 gagcttttagagcaaatcaatcgcgctcttaaccaaataggaattatcacaccttataat  
 gcccaa

### EPIYA-containing region of CagA

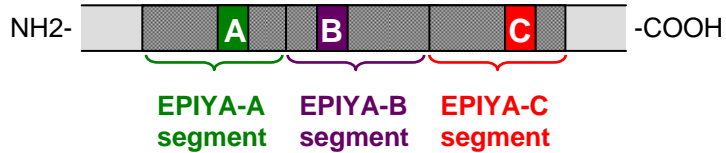

Supplement: NIHMS254568-supplement-01.pdf [file NIHMS254568-supplement-01.pdf]
